# Supplementary material for: Conformational influence of quinoline moieties in the crystal packing of bis(quinolinecarboxamide)alkane derivatives
Source: Royal Society of Chemistry journal article supplement (doi:10.1039/c3ce40807h), 2013-01-01
Supplement: c3ce40807h.pdf [file c3ce40807h.pdf]

## Supplementary Information

for the manuscript

### **Conformational Influence of Quinoline Moieties in the Crystal Packing of Bis-Carboxamidoquinolines Derivatives**

Nicole Parra,<sup>†</sup> Luz Guarda,<sup>†</sup> Julio B. Belmar,<sup>†</sup> Paulina I. Hidalgo, <sup>†</sup> Claudio A. Jiménez,<sup>†\*</sup> Jorge Pasán<sup>‡\*</sup> and Catalina Ruiz-Pérez<sup>‡</sup>

*<sup>†</sup>Departamento de Química Orgánica. Facultad de Ciencias Químicas. Universidad de Concepción. Casilla 160-C, Concepción. Chile. [cjimenez@udec.cl](mailto:cjimenez@udec.cl)*

*<sup>‡</sup> Laboratorio de Rayos X y Materiales Moleculares. Departamento de Física Fundamental II. Facultad de Física. Universidad de La Laguna. Avda. Astrofísico Francisco Sánchez s/n, E-38204 La Laguna. Spain. [jpasang@ull.es](mailto:jpasang@ull.es)*

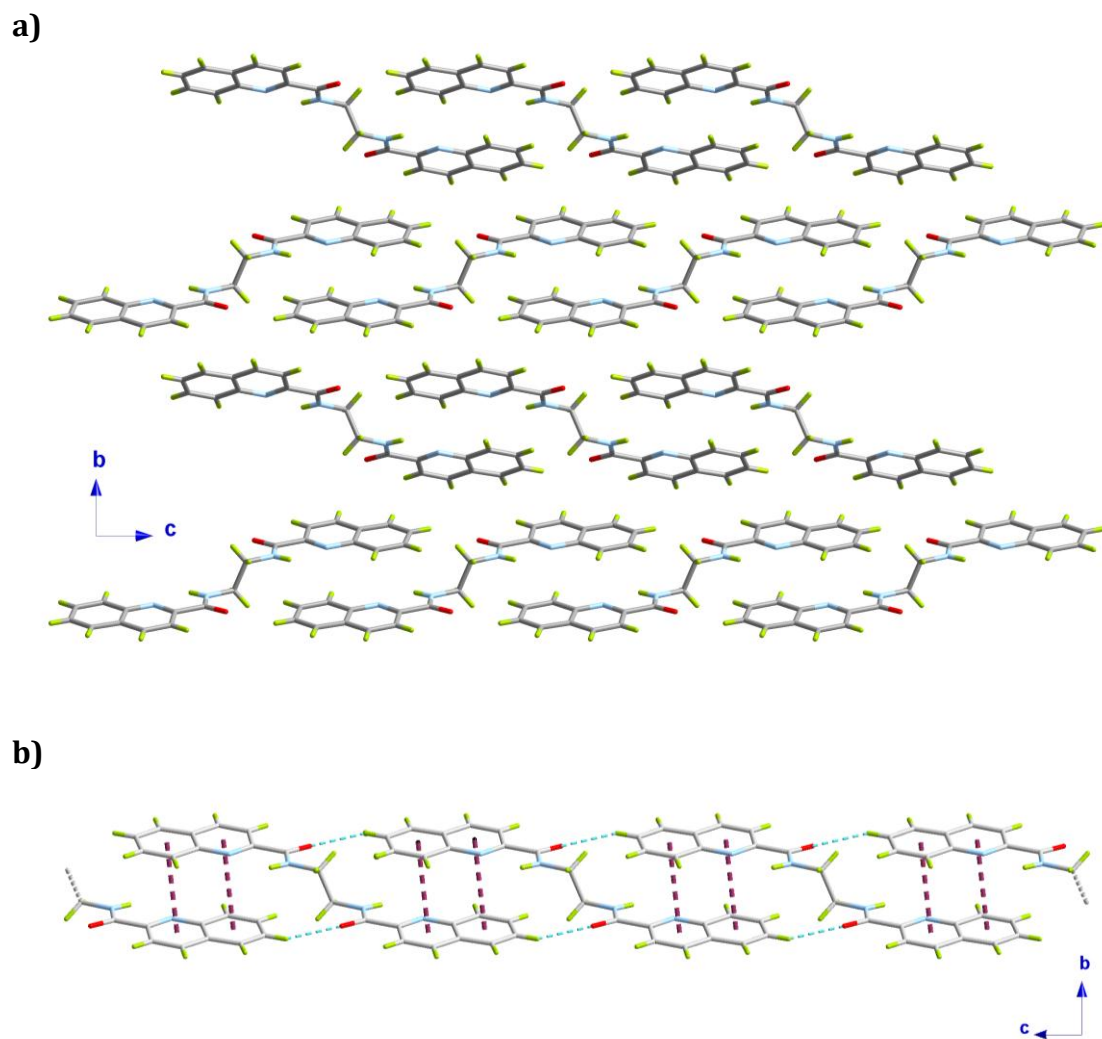

**Figure S1. a)** A view of the crystal packing of **4a** along the crystallographic *a* axis. **b)** A view along the *a* axis of the supramolecular layer formed by the  $\pi$ - $\pi$  stacking of the quinoline groups and C-H $\cdots$ O interactions.

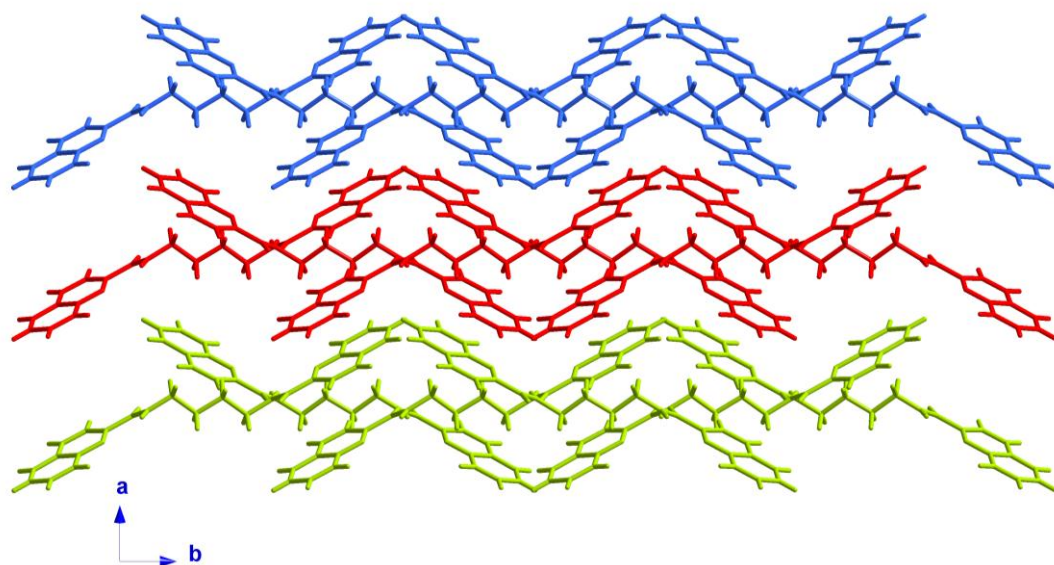

**Figure S2.** A view of the crystal packing of **4b** along the crystallographic *c* axis. Each supramolecular (4,4)-net is depicted in a different colour. The valleys face the hills of the adjacent layer, leading to a regular stacking along the *a* direction following an *ABABAB* sequence.

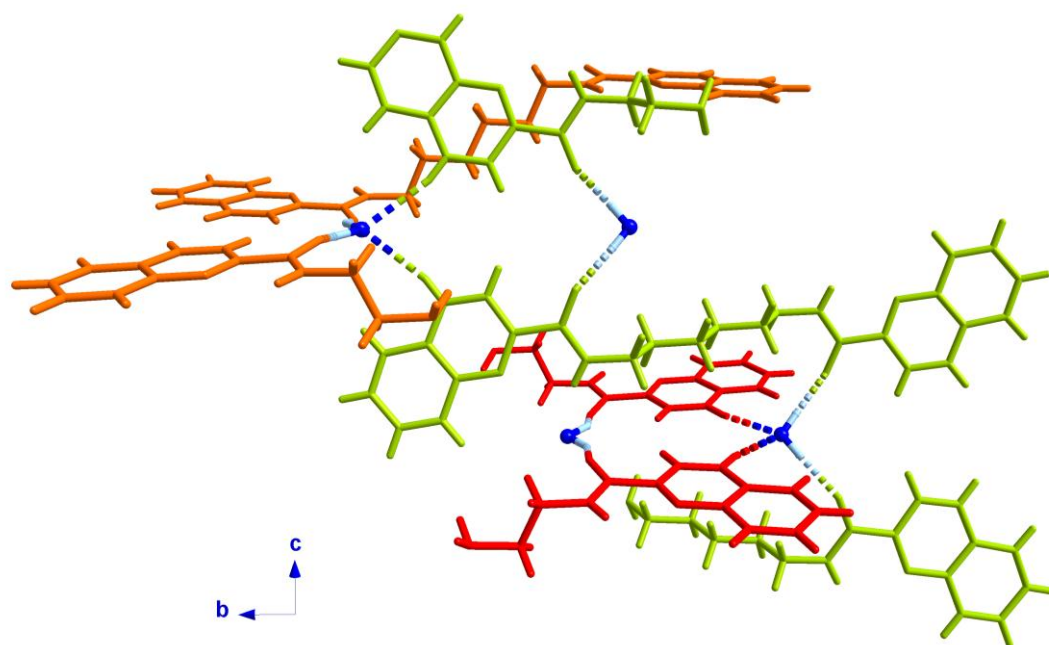

**Figure S3.** A view along the  $a$  axis of the interconnection through C-H...O hydrogen bonds of the two crystallographically independent supramolecular chains of **5c**. The chain in green is growing in the [001] direction, while those in orange and red does it in the [201] direction.

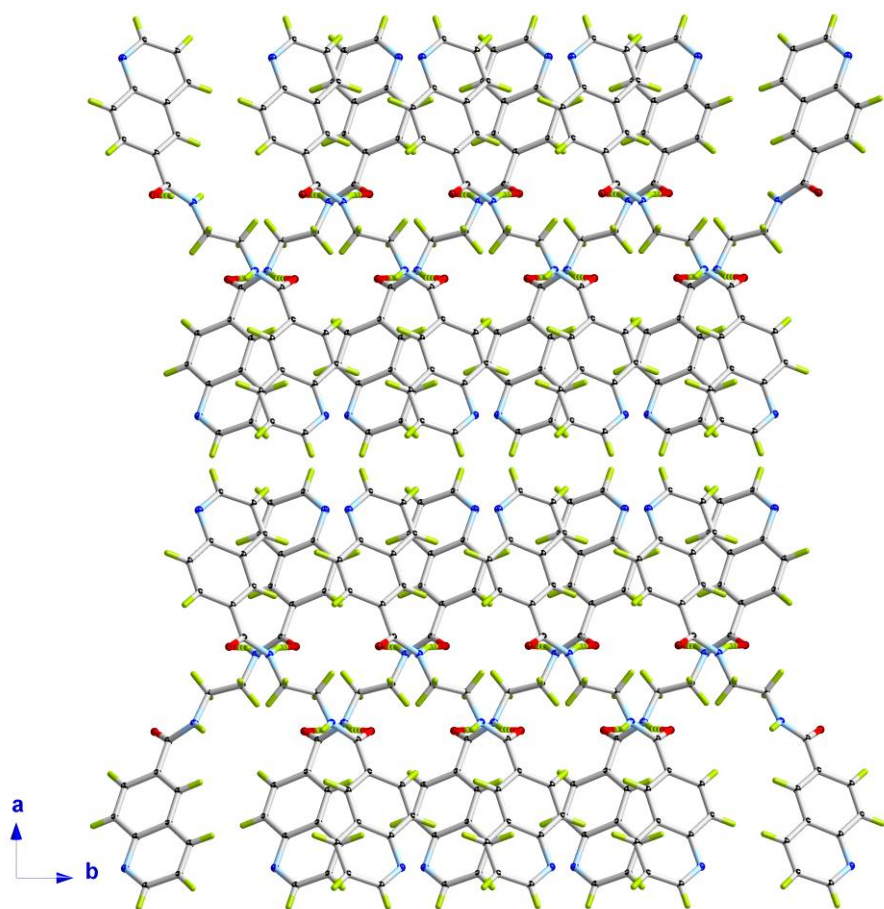

**Figure S4.** A view of the crystal packing of **5a** along the *c* direction.

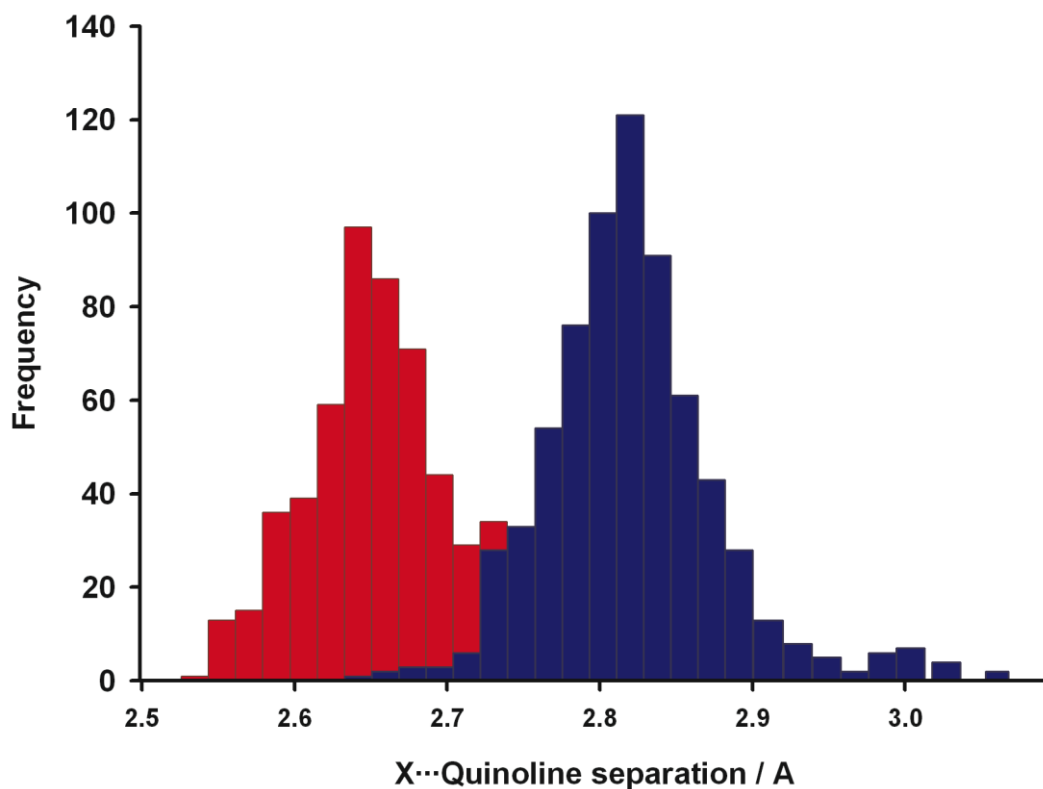

**Figure S5.** Histogram of the frequency of N...N(quinoline) (in red) and O...C(quinoline) (in blue) bond separations when the fragment shown in Scheme S1 is surveyed in the CSD database.

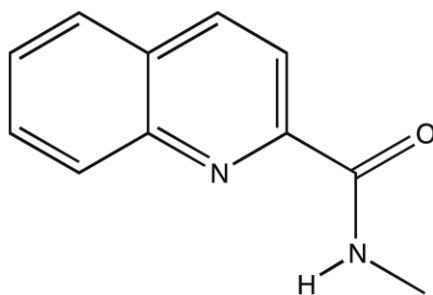

**Scheme S1**

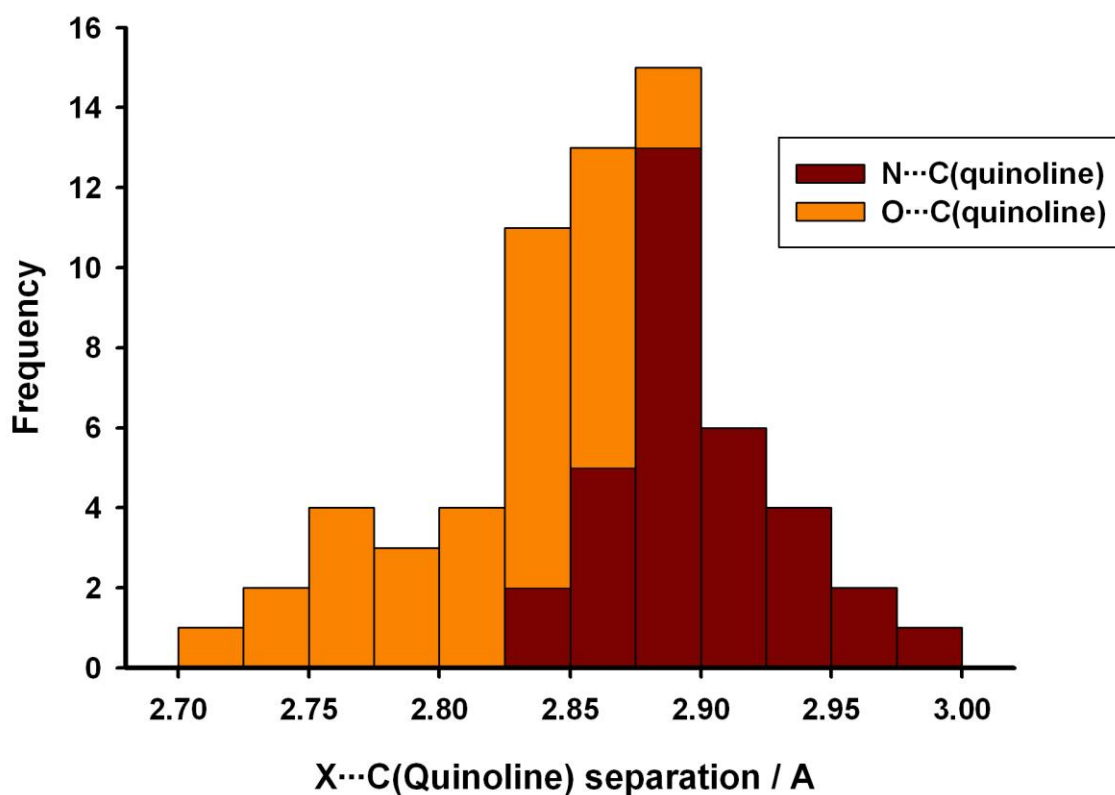

**Figure S6.** Histogram of the frequency of N...C(quinoline) (in red) and O...C(quinoline) (in orange) bond separations when the fragment shown in Scheme S2 is surveyed in the CSD database.

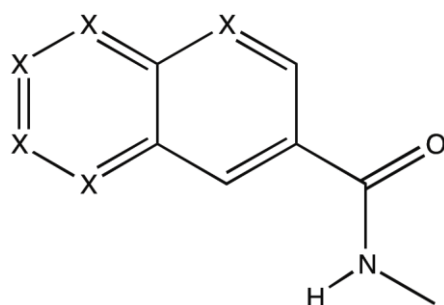

**Scheme S2.** In order to get more results in the survey, we have not restricted the search only for 6-quinoline-derivatives, and **X** can be either C or N.
